# Supplementary material
Source: HighWire-hosted journal article supplement (http://rc.rcjournal.com/highwire/filestream/25715/field_highwire_adjunct_files/2/rc-10803-File005.pdf)

supplemental figure 2: Density plots of minute-by-minute tidal volumes for all recorded volume-targeted breaths

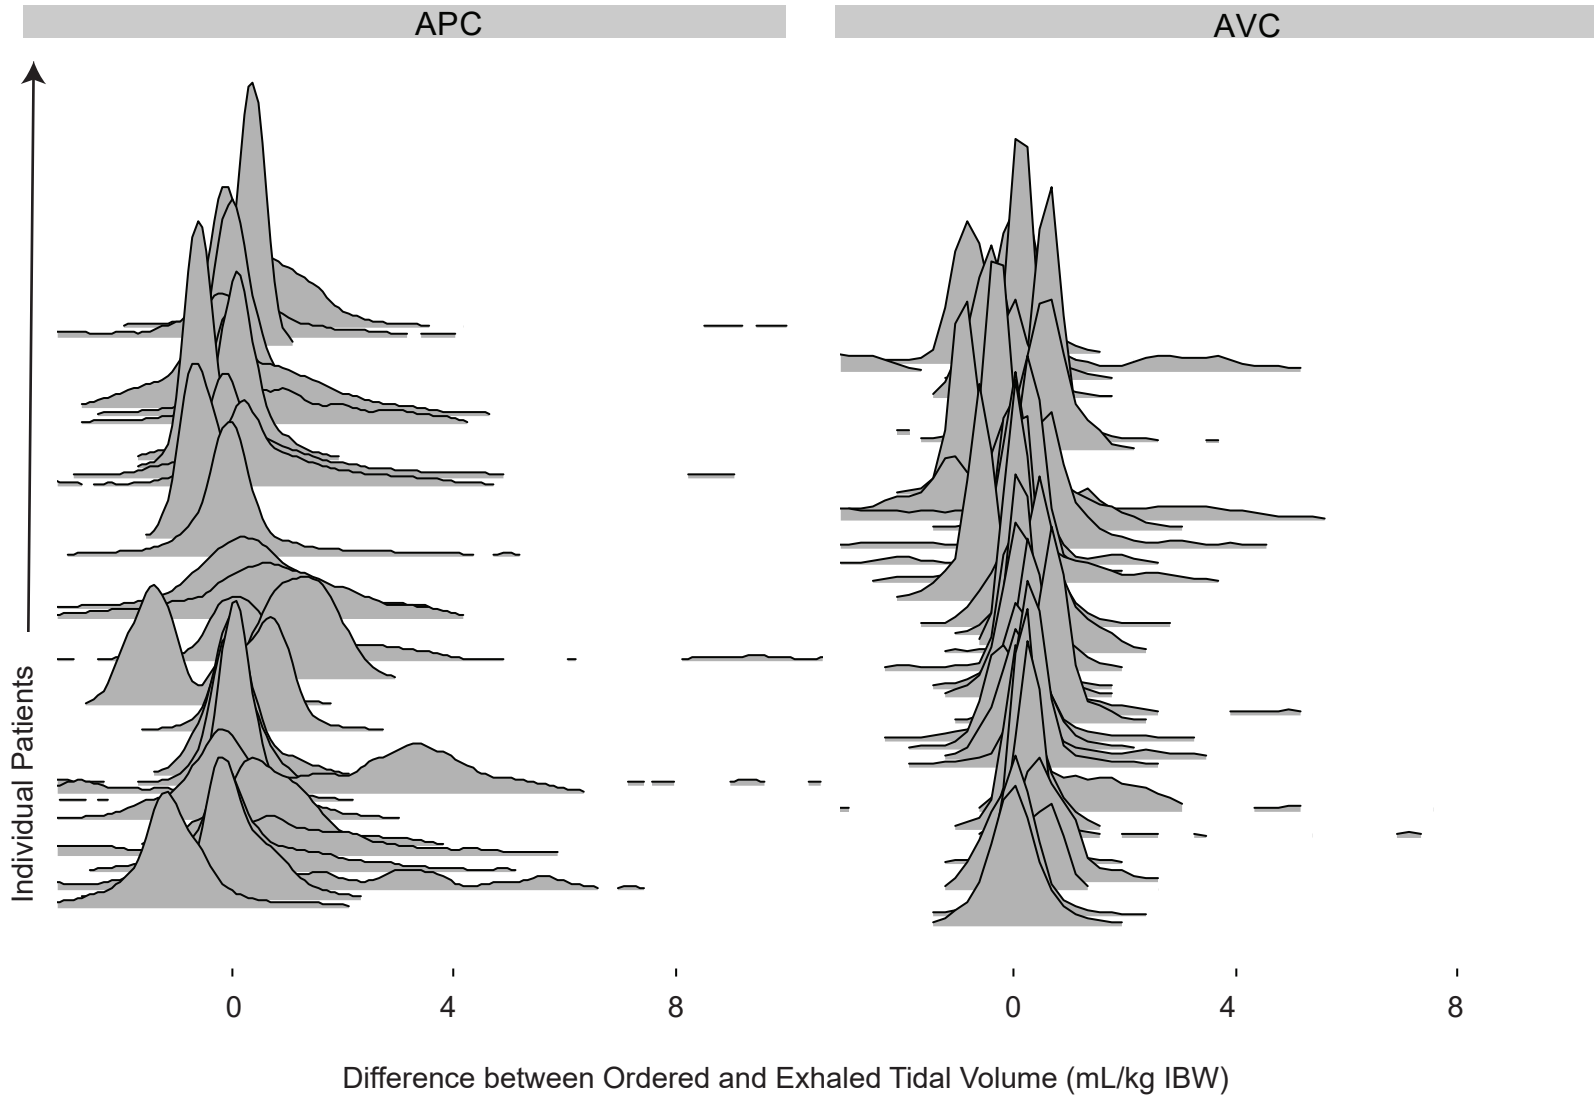

Supplement: rc-10803-File005.pdf [file rc-10803-File005.pdf]
